# Supplementary material
Source: HighWire-hosted journal article supplement (http://ajnr-stage2.highwire.org/highwire/filestream/64899/field_highwire_adjunct_files/0/18-00545.pdf)
Supplement: 18-00545.pdf [file 18-00545.pdf]

**On-line Table 1: Brain lesions on MR imaging<sup>a</sup>**

| Diagnosis            | Disease Status        | SAG FLAIR ( <i>n</i> = 35 Exams) | AX SPGR ( <i>n</i> = 34 Exams) |
|----------------------|-----------------------|----------------------------------|--------------------------------|
| No brain abnormality |                       | 1 (2.9)                          | 2 (0.0)                        |
| Glioblastoma         | Nontreated            | 1 (2.9)                          | 0 (0.0)                        |
|                      | Treated               | 0 (0.0)                          | 0 (0.0)                        |
|                      | Treated with residual | 6 (17.1)                         | 0 (0.0)                        |
| WHO grade III glioma | Nontreated            | 0 (0.0)                          | 0 (0.0)                        |
|                      | Treated               | 0 (0.0)                          | 0 (0.0)                        |
|                      | Treated with residual | 12 (34.3)                        | 0 (0.0)                        |
| WHO grade II glioma  | Nontreated            | 1 (2.9)                          | 0 (0.0)                        |
|                      | Treated               | 0 (0.0)                          | 0 (0.0)                        |
|                      | Treated with residual | 8 (22.9)                         | 3 (9.7)                        |
| WHO grade I glioma   | Nontreated            | 1 (2.9)                          | 0 (0.0)                        |
|                      | Treated               | 0 (0.0)                          | 0 (0.0)                        |
|                      | Treated with residual | 2 (5.7)                          | 3 (9.7)                        |
| CNS lymphoma         | Nontreated            | 1 (2.9)                          | 1 (3.2)                        |
|                      | Treated               | 0 (0.0)                          | 1 (3.2)                        |
|                      | Treated with residual | 1 (2.9)                          | 0 (0.0)                        |
| Metastasis           | Nontreated            | 0 (0.0)                          | 4 (12.9)                       |
|                      | Treated               | 0 (0.0)                          | 0 (0.0)                        |
|                      | Treated with residual | 1 (2.9)                          | 17 (54.8)                      |

**Note:**—WHO indicates World Health Organization; SAG, sagittal; AX, axial.

<sup>a</sup> Values are No. (%).

**On-line Table 2: Lesion sizes<sup>a</sup>**

|                              | SAG FLAIR ( <i>n</i> = 34 Exams) <sup>b</sup> | AX SPGR ( <i>n</i> = 32 Exams) <sup>b</sup> |
|------------------------------|-----------------------------------------------|---------------------------------------------|
| Largest lesion <sup>c</sup>  |                                               |                                             |
| Largest diameter (mm)        | 27 (2–58)                                     | 11 (2–45)                                   |
| Perpendicular diameter (mm)  | 18 (2–30)                                     | 9 (1–32)                                    |
| Smallest lesion <sup>c</sup> |                                               |                                             |
| Largest diameter (mm)        | 9 (2–58)                                      | 10 (2–25)                                   |
| Perpendicular diameter (mm)  | 6 (2–30)                                      | 8 (1–21)                                    |

**Note:**—SAG indicates sagittal; AX, axial.

<sup>a</sup> Values are median (range).

<sup>b</sup> One FLAIR exam and 2 SPGR exams did not have any lesions present.

<sup>c</sup> Singular lesions are summarized under both largest and smallest lesions.

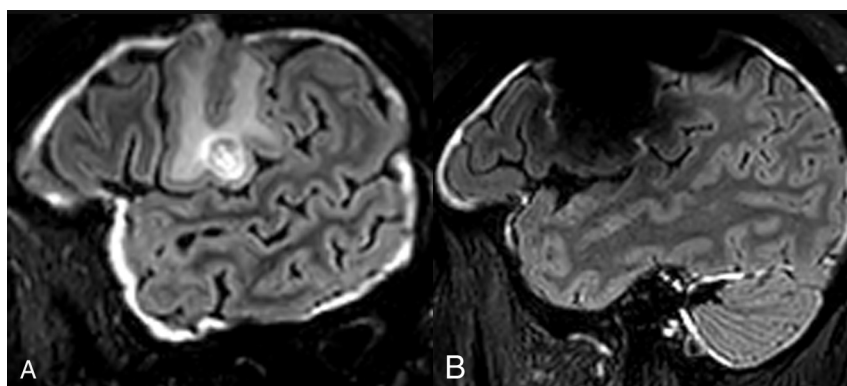

**ON-LINE FIGURE.** Conventional acquisition sagittal 3D T2-FLAIR images in the right parasagittal (A) and left parasagittal (B) planes. A, Metastatic lesion in the right frontal operculum with surrounding edema. B, Susceptibility artifacts resulting from an overlying shunt reservoir. On the 5-point scale for image artifacts, 1 reviewer rated this acquisition as 4 (trace image artifact), while the other reviewer rated this acquisition as 1 (severe image artifacts).
